# Supplementary material
Source: PubMed Central journal article supplement (PMC3137050)
Supplement: supp_M110.167734_jbc.M110.167734-1.pdf [file supp_M110.167734_jbc.M110.167734-1.pdf]

# Supplementary Figure 1

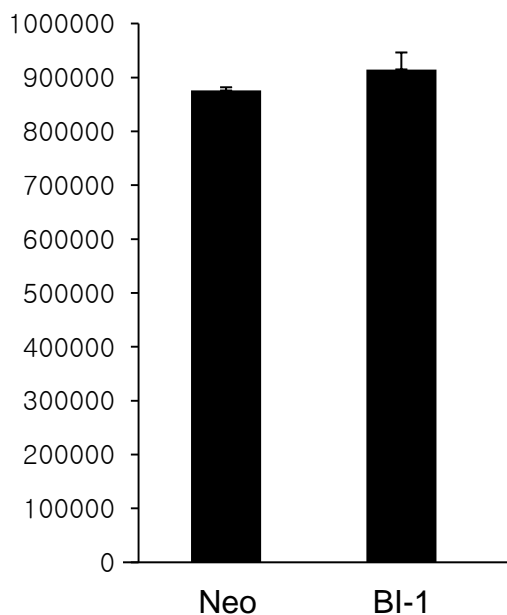

**Supplementary Figure 1.** Protein synthesis did not differ between Neo and BI-1 cells. Protein synthesis is similar in Neo and BI-1 cells.  $^{35}\text{S}$  was labeled in serum-starved Neo and BI-1 cells. The radioactivity was measured by scintillation counting using Ecoscint A scintillation fluid (National Diagnostics, Atlanta, GA) and detection as counts per minute (cpm) on a Packard 1500 Tri-Carb Scintillation Counter (Packard Instrument Co., Downers Grove, IL).
