# Supplementary material
Source: PubMed Central journal article supplement (PMC3137050)
Supplement: supp_M110.167734_jbc.M110.167734-2.pdf [file supp_M110.167734_jbc.M110.167734-2.pdf]

# Supplementary Figure 2

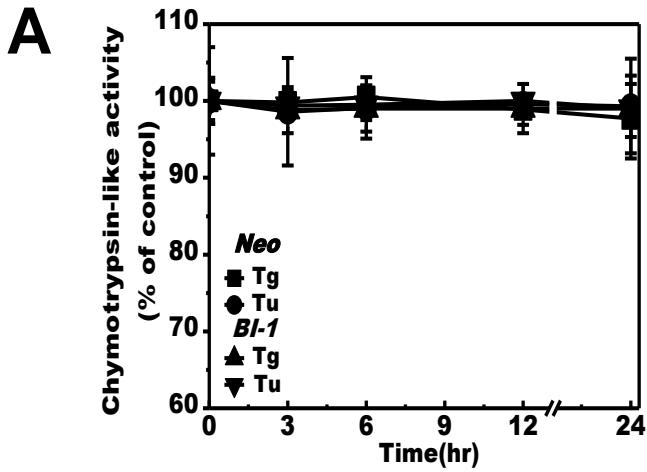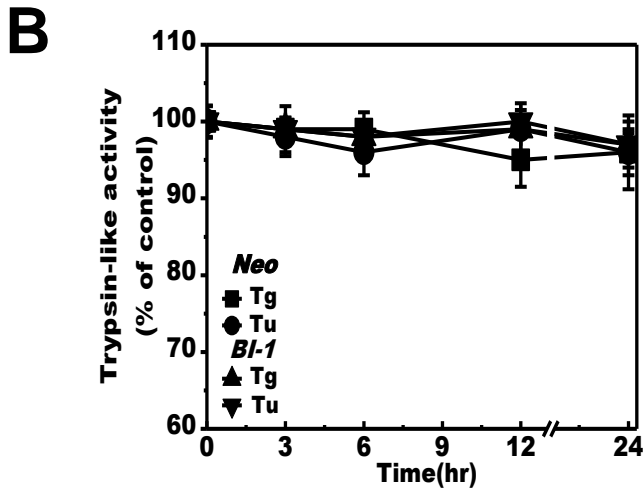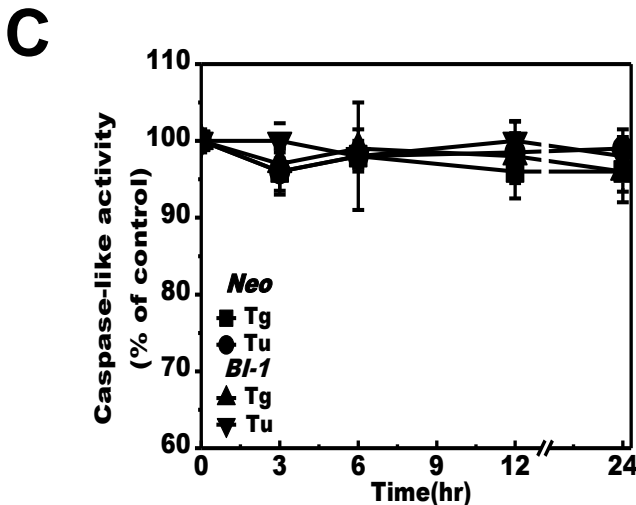

**Supplementary Figure 2.** Proteasome activity did not differ between Neo and BI-1 cells under ER stress. Neo and BI-1 cells were subjected to either 5  $\mu$ M thapsigargin or 5  $\mu$ g/ml tunicamycin during the indicated time periods. Proteasome activity was calculated by measuring the peptidolytic activity (chymotrypsin-like (A), trypsin-like (B), and caspase-like peptidases (C)). Fluorogenic substrates were incubated with cell extracts for 30 minutes in the presence of 2 mM ATP and proteasome activity was determined by measuring the fluorescence. Each value is expressed as the mean  $\pm$  SEM of three independent experiments.
