# Supplementary material
Source: PubMed Central journal article supplement (PMC3137050)
Supplement: supp_M110.167734_jbc.M110.167734-3.pdf [file supp_M110.167734_jbc.M110.167734-3.pdf]

# Supplementary Figure 3

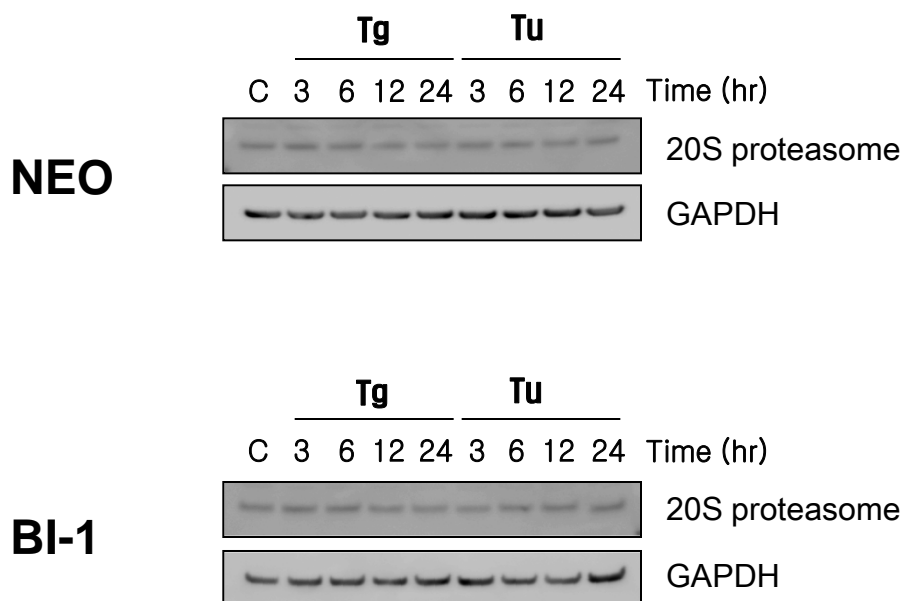

**Supplementary Figure 3.** Expression of the 20S proteasome did not differ between Neo and BI-1 cells under ER stress. Neo and BI-1 cells were subjected to either 5  $\mu$ M thapsigargin or 5  $\mu$ g/ml tunicamycin during the indicated time periods and western blotting was performed with anti-20S proteasome or  $\beta$ -actin antibody. Representative blots are shown.
