# Supplementary material
Source: PubMed Central journal article supplement (PMC3137050)
Supplement: supp_M110.167734_jbc.M110.167734-4.pdf [file supp_M110.167734_jbc.M110.167734-4.pdf]

## Supplementary Figure 4

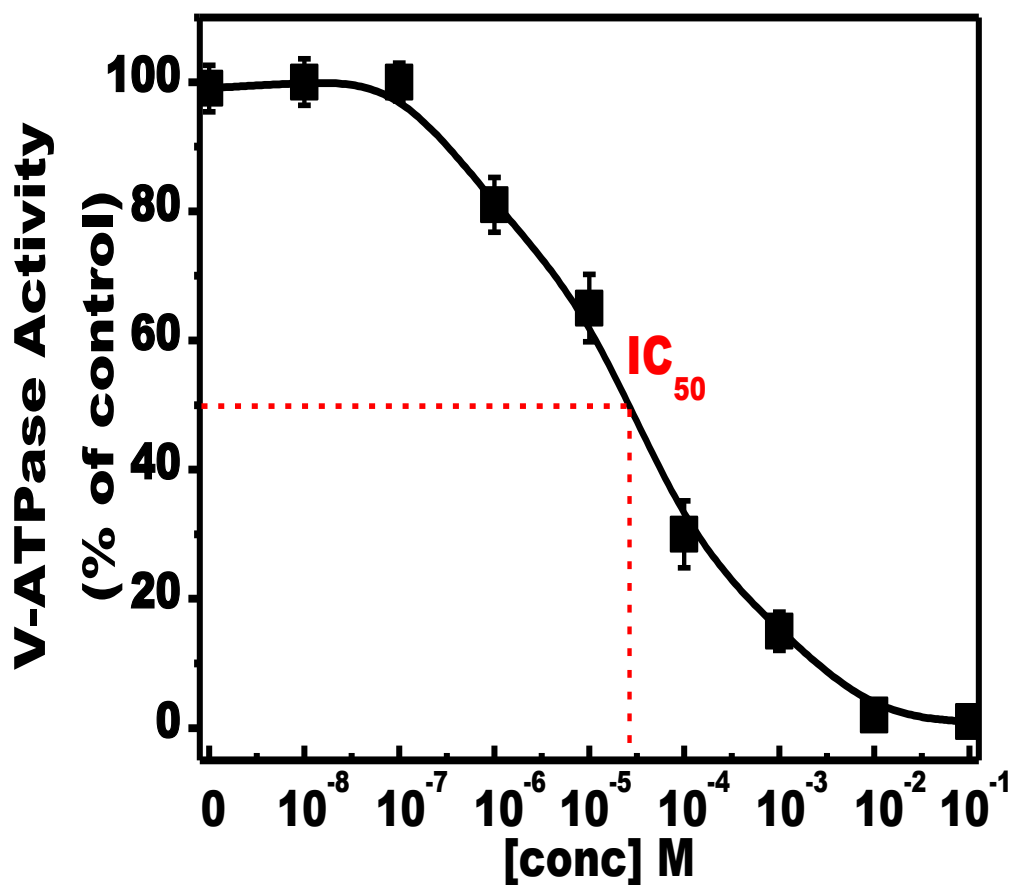

**Supplementary Figure 4.** After isolation of the lysosome fraction, the indicated concentrations of bafilomycin were incubated. V-ATPase activity was measured to assess lysosomal activity with the lysosomal fractions described in the Materials and Methods section.
