# Supplementary material
Source: PubMed Central journal article supplement (PMC3137050)
Supplement: supp_M110.167734_jbc.M110.167734-5.pdf [file supp_M110.167734_jbc.M110.167734-5.pdf]

# Supplementary Figure 5

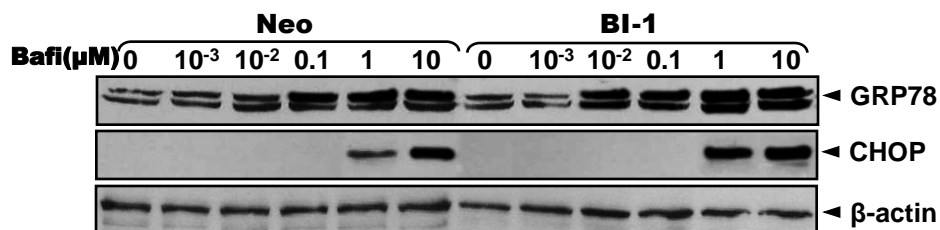

**Supplementary Figure 5.** The bafilomycin-induced ER stress response was more active in BI-1 cells than in Neo cells. Neo and BI-1 cells were subjected to 0.001, 0.01, 0.1, 1, and 10  $\mu\text{M}$  bafilomycin for 4 hours, and then western blotting was performed with anti-GRP78, CHOP, or  $\beta$ -actin antibody. Representative blots are shown.
