# Supplementary material
Source: PubMed Central journal article supplement (PMC3137050)
Supplement: supp_M110.167734_jbc.M110.167734-6.pdf [file supp_M110.167734_jbc.M110.167734-6.pdf]

# Supplementary Figure 6

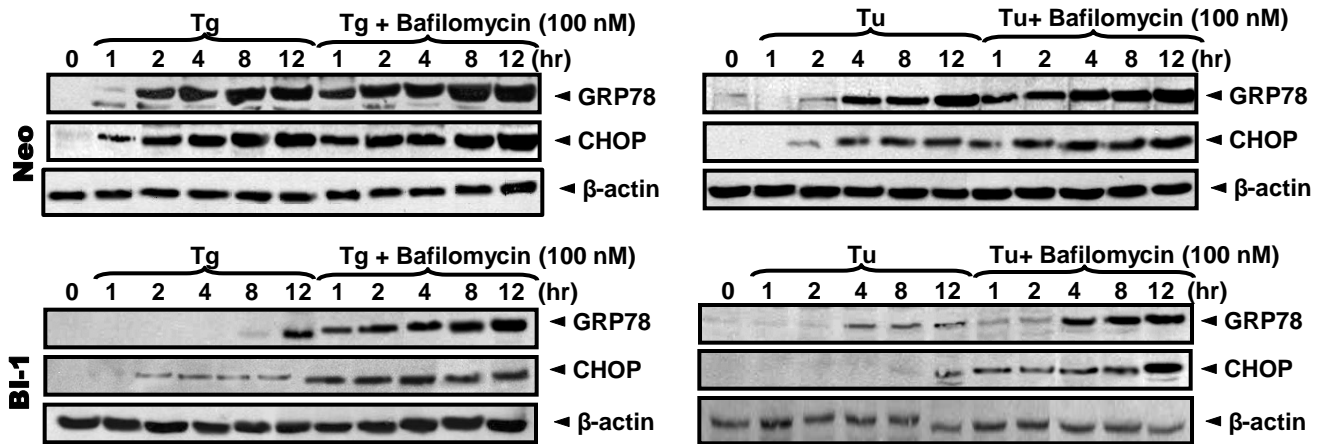

**Supplementary Figure 6.** 100 nM bafilomycin reverses the BI-1-regulated ER stress response. Neo and BI-1 cells were subjected to either 5  $\mu$ M thapsigargin or 5  $\mu$ g/ml tunicamycin with or without 100 nM bafilomycin for 0, 1, 2, 4, 8, or 12 hours, and then western blotting was performed with anti-GRP78, CHOP, or  $\beta$ -actin antibody. Representative blots for thapsigargin and tunicamycin are shown in the upper and lower panels, respectively.
