# Supplementary material
Source: PubMed Central journal article supplement (PMC3137050)
Supplement: supp_M110.167734_jbc.M110.167734-7.pdf [file supp_M110.167734_jbc.M110.167734-7.pdf]

# Supplementary Figure 7

**A**

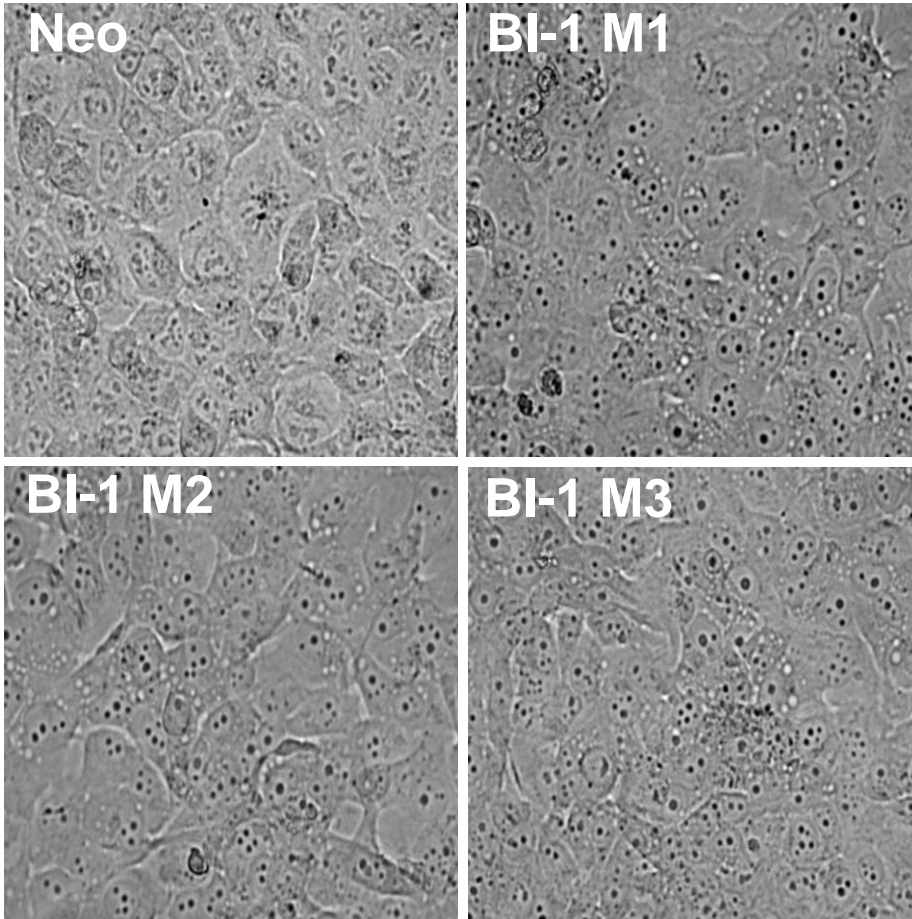

**B**

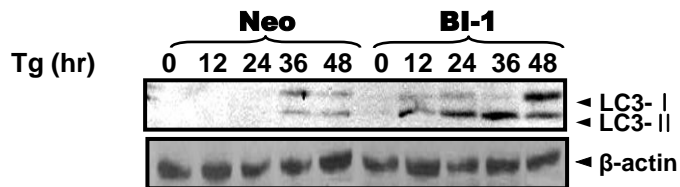

**Supplementary Figure 7.** The expression of BI-1 induces autophagy formation. A picture of cell morphology was taken when Neo cells and various clones of BI-1 cells were cultured with thapsigargin for a period of 24 hours (X 200) (A). Neo and BI-1 cells (M1 cells) were treated with 5  $\mu$ M thapsigargin and then harvested after the indicated time periods (12, 24, 36, or 48 hours). Cell lysates were immunoblotted after SDS-PAGE with anti-LC3-I/II or  $\beta$ -actin antibody (B).
